# Supplementary figures and images for: Inability of granule polarization by NK cells defines tumor resistance and can be overcome by CAR or ADCC mediated targeting
Source: PubMed Central journal article supplement — J Immunother Cancer. 2021 Jan 18;9(1):e001334. doi: 10.1136/jitc-2020-001334 (PMC7817806; doi:10.1136/jitc-2020-001334), 2021-01-18

Fig. S2

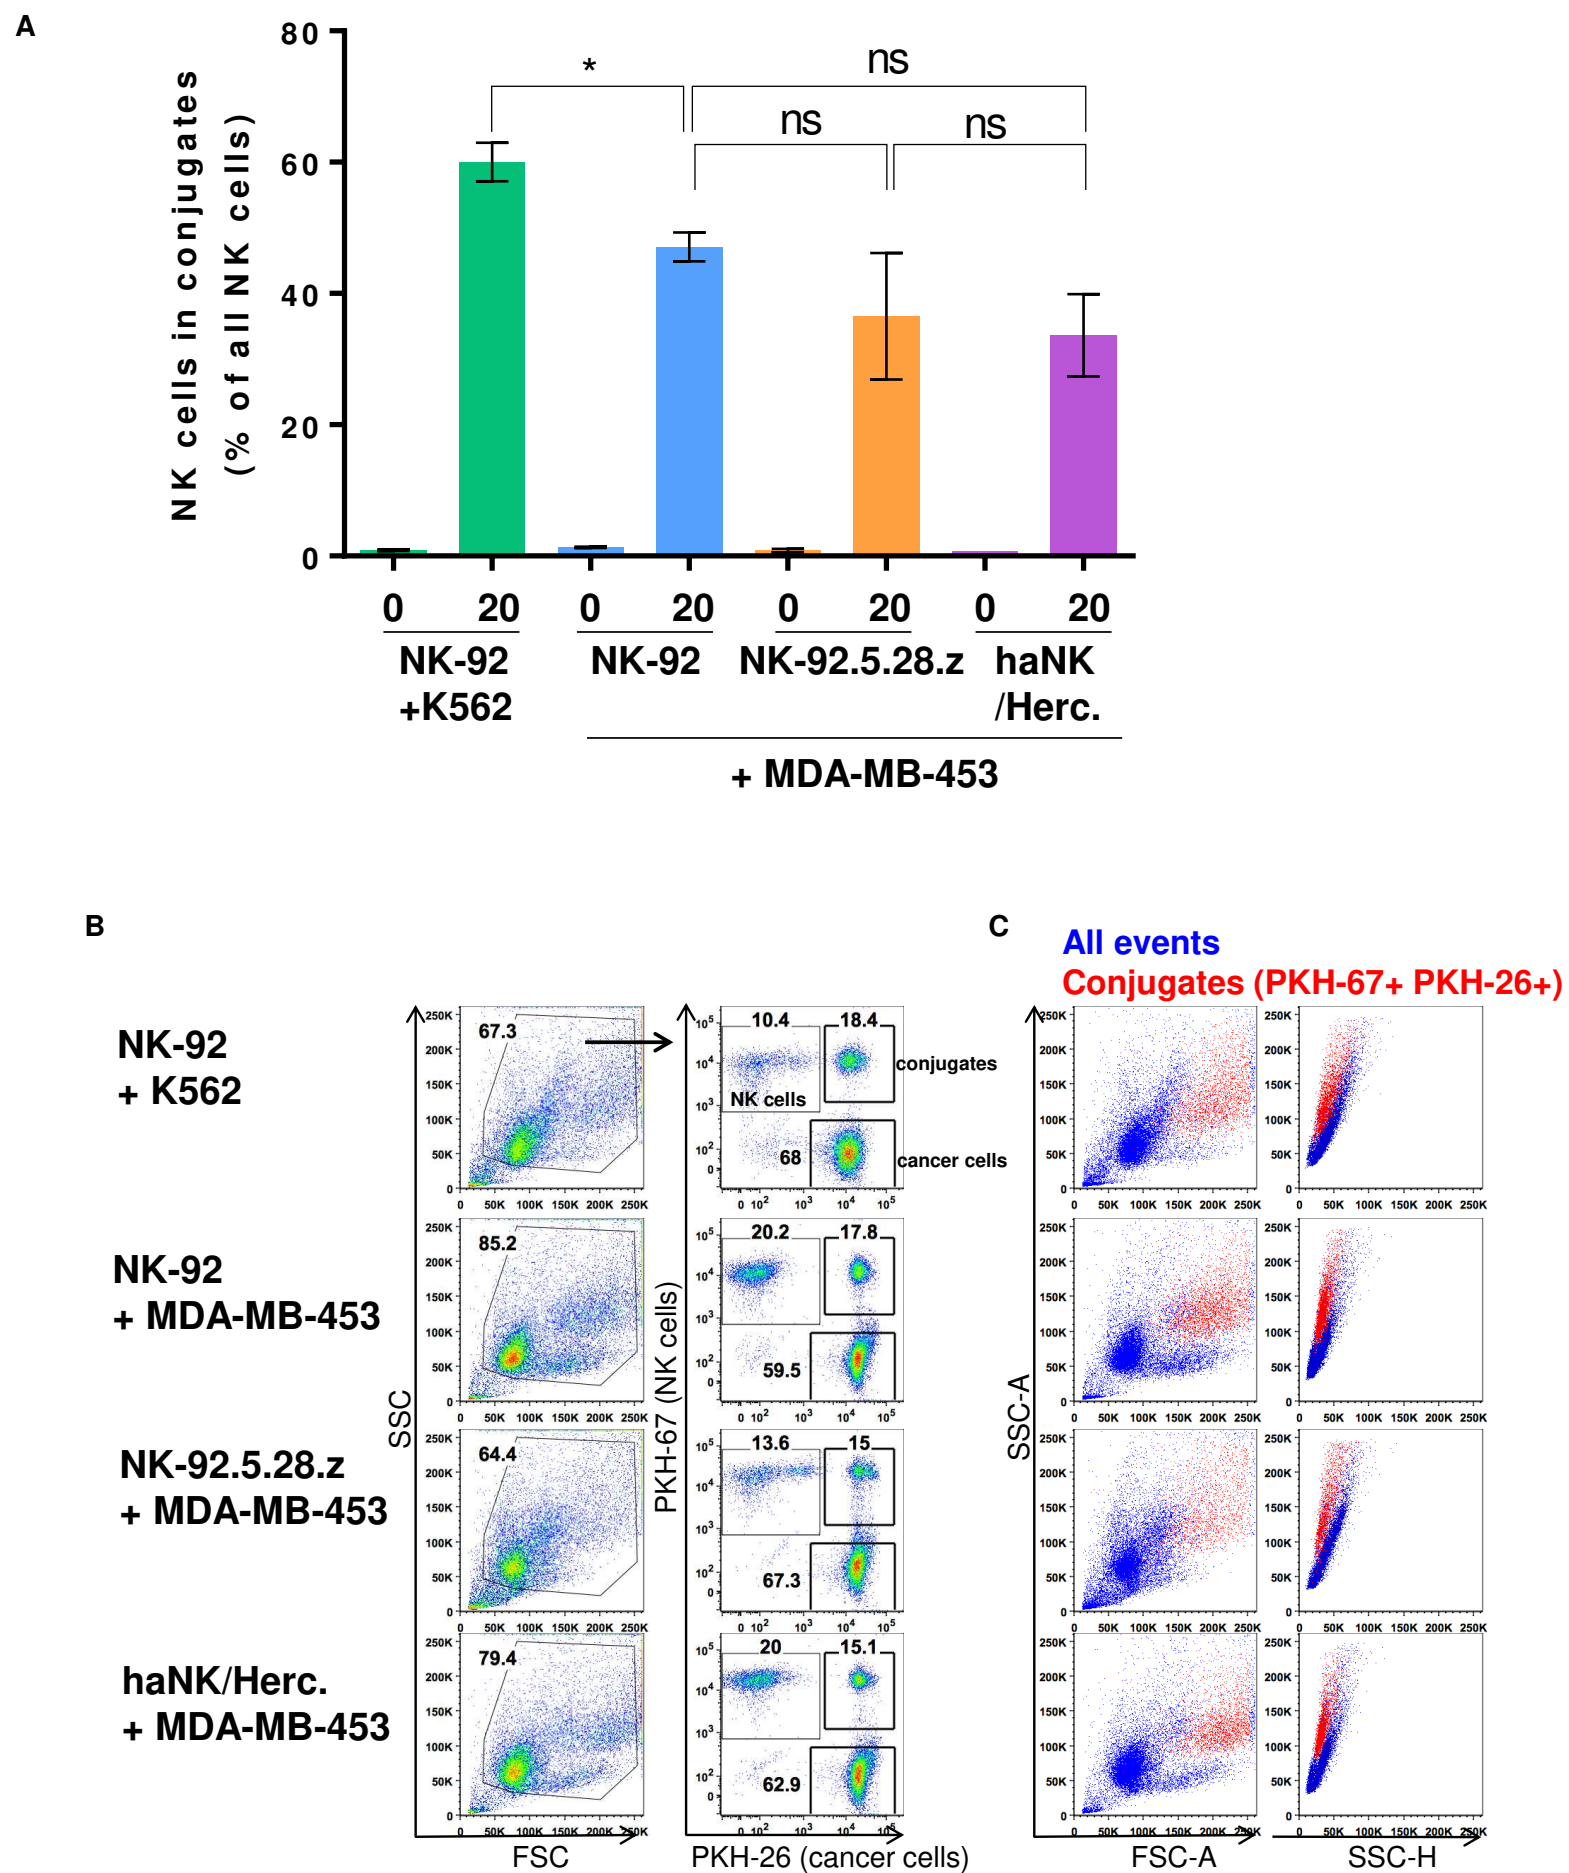

Supplement: jitc-2020-001334supp009.pdf [file jitc-2020-001334supp009.pdf]

**Fig. S3**

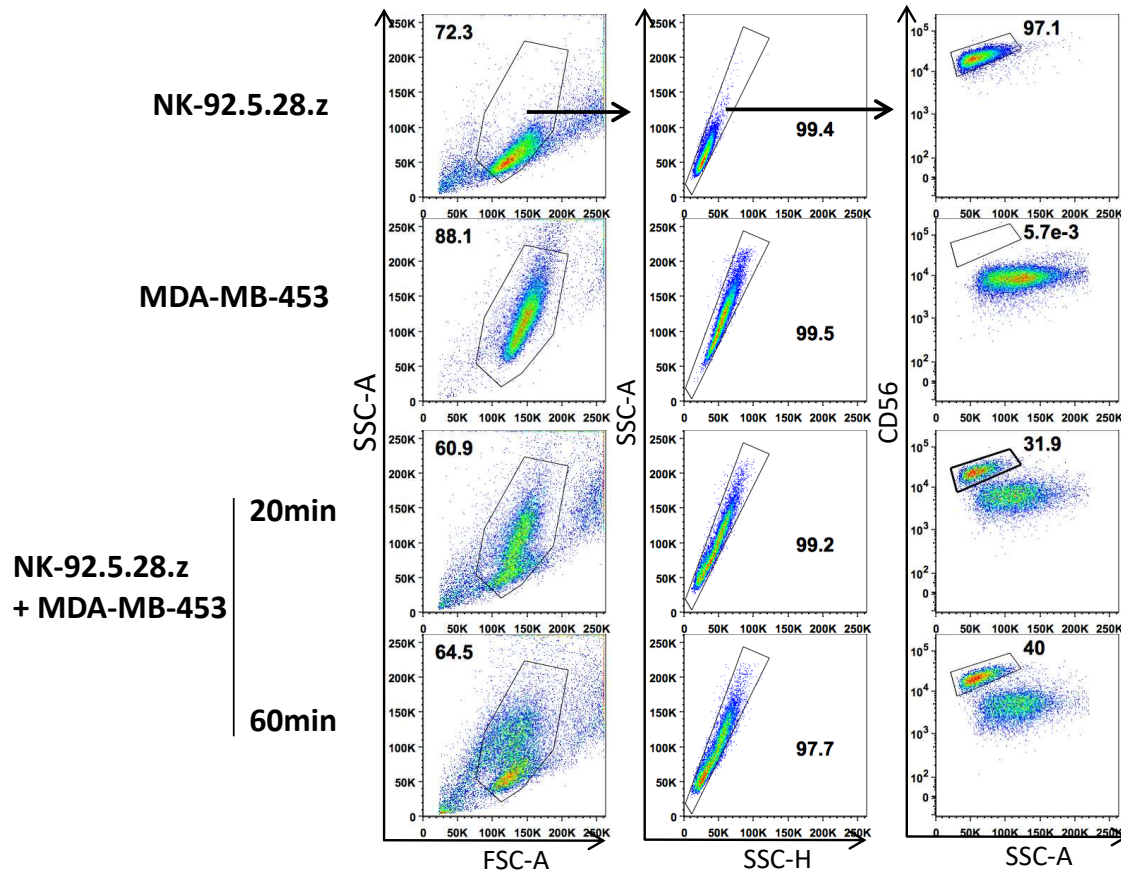

Supplement: jitc-2020-001334supp013.pdf [file jitc-2020-001334supp013.pdf]
